# Supplementary material for: Spatial impacts of a multi-individual grave on microbial and microfaunal communities and soil biogeochemistry
Source: PubMed Central journal article supplement (PMC6291161; doi:10.1371/journal.pone.0208845), 2018-12-12
Supplement: pone.0208845.s008.pdf [file pone.0208845.s008.pdf]

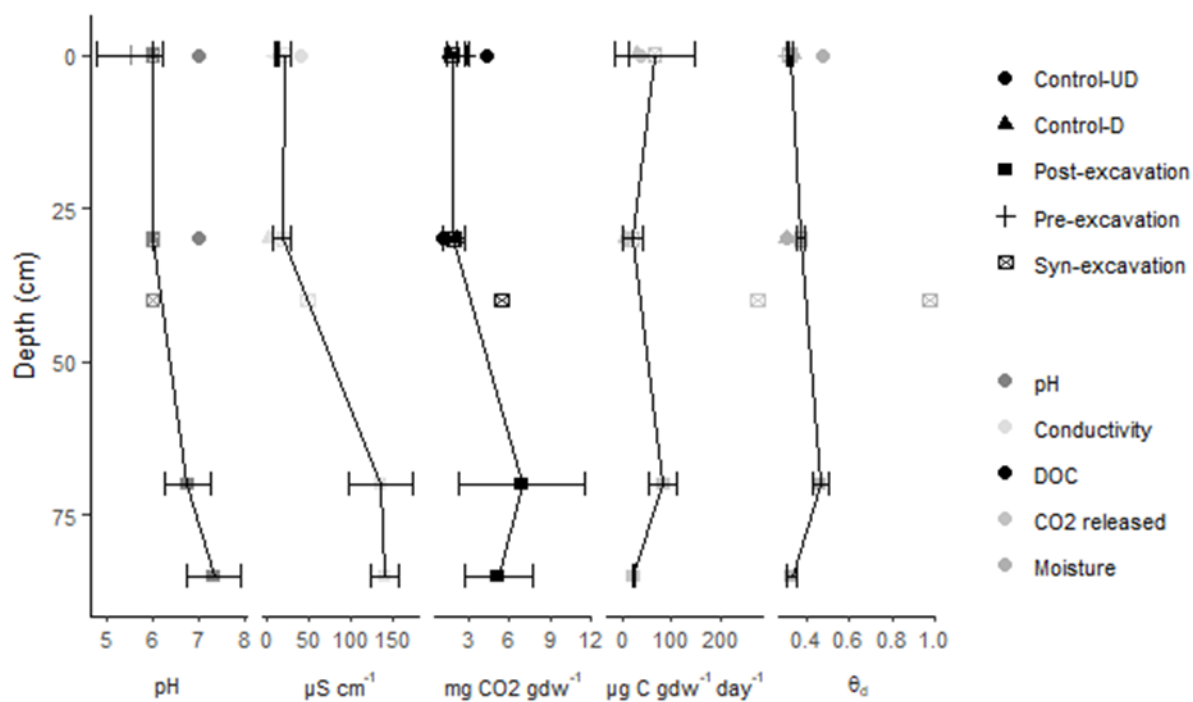

**S2 Fig. Changes in soil physicochemical parameters within the grave.** Points are mean and standard deviation of n=3 samples.
