# Supplementary material for: Spatial impacts of a multi-individual grave on microbial and microfaunal communities and soil biogeochemistry
Source: PLOS journal article supplement (doi:10.1371/journal.pone.0208845), 2018-12-12
Supplement: S10 (10.1371/journal.pone.0208845.s010) [file journal.pone.0208845.s010]

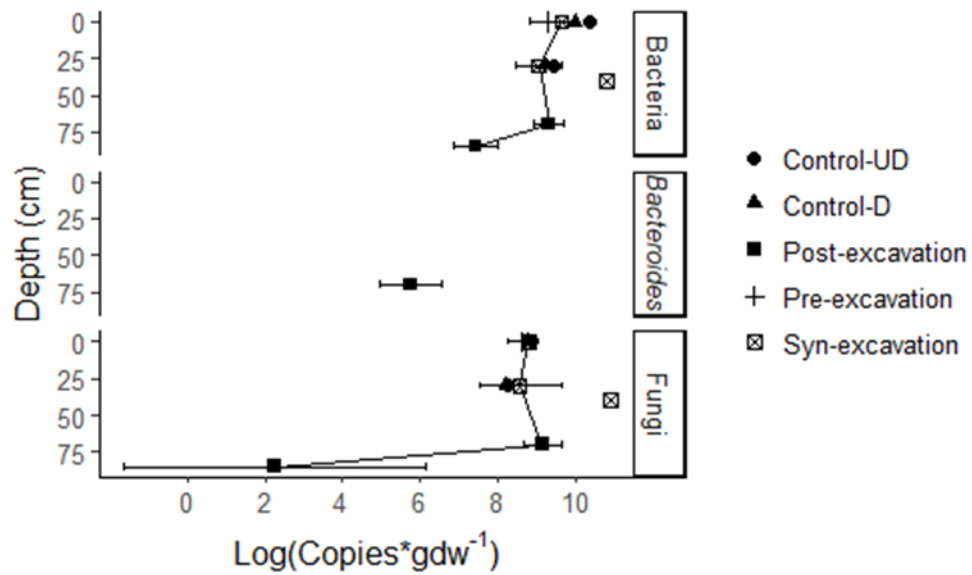

**S4 Fig. Gene copy abundances of Total 16S rRNA (Bacteria), *Bacteroides* 16S rRNA (*Bacteroides*), and ITS (Fungi) within the grave. *Bacteroides* were below detection in all but the 70-75 cm samples.**
